# Supplementary material for: Decreasing foraminiferal flux in response to ongoing climate change in the Santa Barbara Basin, California
Source: Copernicus journal article supplement (doi:10.5194/bg-22-4035-2025), 2025-08-22
Supplement: Supplementary file 1 [file bg-22-4035-2025-supplement.zip]

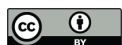

*Supplement of*

**Decreasing foraminiferal flux in response to ongoing climate change in the Santa Barbara Basin, California**

**Emily Havard et al.**

*Correspondence to:* Emily Havard (ehhavard@gmail.com)

- [bg-22-4035-2025-supplement-title-page.pdf](#)
- [SBB\\_SedTrap\\_ParticleFlux.xlsx](#)

The copyright of individual parts of the supplement might differ from the article licence.
