# Supplementary material for: Decreasing foraminiferal flux in response to ongoing climate change in the Santa Barbara Basin, California
Source: Copernicus journal article supplement (doi:10.5194/bg-22-4035-2025), 2025-08-22
Supplement: Supplementary file 1 [file bg-22-4035-2025-supplement.zip]

## Sheet: Sediment Trap Particle Flux
Date	Julian	Mid Julian	Organic Carbon Flux (g/m2/day)	CaCO3 Flux (g/m2/day)	Opal Flux (g/m2/day)	Terrigenous Flux (g/m2/day)	Nitrogen Flux (g/m2/day)	Mass Flux (g/m2/day)
1993-08-12	224	231	0.1	0.208
1993-08-26	238	245	0.095	0.173
1993-09-09	252	259	0.078	0.165
1993-09-23	266	273	0.064	0.131
1993-10-07	280	287	0.058	0.112
1993-10-21	294	301	0.053	0.127
1993-11-04	308	315	0.06	0.134
1993-11-18	322	329	0.052	0.128
1993-12-02	336	343	0.084	0.269
1993-12-16	350	357	0.067	0.192
1993-12-30	364	371	0.054	0.148
1994-01-13	378	385	0.063	0.176
1994-01-27	392	399	0.054	0.183
1994-02-11	407	414	0.063	0.153
1994-02-25	421	428	0.036	0.12
1994-03-11	435	442	0.038	0.135
1994-03-25	449	456	0.044	0.124
1994-04-08	463	470	0.064	0.133
1994-04-22	477	484	0.073	0.087
1994-05-06	491	498	0.11	0.136
1994-05-20	505	512	0.088	0.188
1994-06-03	519	526	0.104	0.17
1994-06-17	533	540	0.181	0.22
1994-07-01	547	554	0.108	0.179
1994-07-15	561	568	0.079	0.107
1994-07-29	575	582	0.115	0.136
1994-08-23	600	607	0.088	0.136
1994-09-06	614	621	0.08	0.137
1994-09-20	628	635	0.063	0.187
1994-10-04	642	649	0.067	0.156
1994-10-18	656	663	0.08	0.118
1995-02-21	782	789	0.07	0.146
1995-03-07	796	803	0.064	0.099
1995-03-21	810	817	0.08	0.138
1995-04-04	824	831	0.105	0.187
1995-04-18	838	845	0.093	0.135
1995-05-02	852	859	0.09	0.137
1995-08-26	968	975	0.116	0.186
1995-09-09	982	989	0.173	0.202
1995-09-23	996	1003	0.165	0.269
1995-10-07	1010	1017	0.112	0.153
1995-10-21	1024	1031	0.076	0.111
1995-11-04	1038	1045	0.083	0.124
1995-11-18	1052	1059	0.04	0.059
1995-12-02	1066	1073	0.068	0.095
1995-12-16	1080	1087	0.122	0.24
1995-12-30	1094	1101	0.051	0.08
1996-01-13	1108	1115	0.022	0.03
1996-01-27	1122	1129	0.058	0.105
1996-02-10	1136	1142.5	0.087	0.161
1996-03-26	1181	1188	0.08	0.161
1996-04-09	1195	1202	0.125	0.132
1996-04-23	1209	1216	0.198	0.178
1996-05-07	1223	1230	0.159	0.242
1996-05-21	1237	1244	0.073	0.123
1996-06-04	1251	1258	0.184	0.244
1996-06-18	1265	1272	0.049	0.081
1996-07-02	1279	1286	0.1	0.218
1996-07-16	1293	1300	0.081	0.152
1996-07-30	1307	1314	0.127	0.214
1996-08-13	1321	1328	0.126	0.173
1996-08-27	1335	1342	0.067	0.095
1996-09-24	1363	1370	0.089	0.122
1996-10-08	1377	1384	0.105	0.172
1996-10-22	1391	1398	0.095	0.172
1996-11-05	1405	1412	0.075	0.123
1996-11-19	1419	1426	0.083	0.163
1996-12-03	1433	1440	0.066	0.104
1996-12-17	1447	1454	0.078	0.116
1996-12-31	1461	1468	0.049	0.062
1997-01-14	1475	1482	0.047	0.078
1997-01-28	1489	1496	0.049	0.081
1997-02-11	1503	1510	0.04	0.062
1997-02-25	1517	1524	0.074	0.092
1997-03-11	1531	1537.5	0.149	0.173
1997-05-22	1603	1606.5	0.174	0.175
1997-05-29	1610	1613.5	0.118	0.158
1997-06-05	1617	1620.5	0.182	0.236
1997-06-12	1624	1627.5	0.118	0.217
1997-06-19	1631	1634.5	0.155	0.294
1997-06-26	1638	1645	0.11	0.25
1997-07-10	1652	1659	0.14	0.284
1997-07-24	1666	1673	0.136	0.241
1997-08-07	1680	1687	0.115	0.231
1997-08-21	1694	1701	0.082	0.157
1997-09-04	1708	1715	0.088	0.164
1997-09-18	1722	1729	0.089	0.16
1997-10-02	1736	1743	0.173	0.337
1997-10-17	1751	1758	0.068	0.151
1997-10-31	1765	1772	0.062	0.154
1997-11-14	1779	1786	0.065	0.16
1997-11-28	1793	1800	0.065	0.159
1997-12-12	1807	1814	0.096	0.214
1997-12-26	1821	1828	0.078	0.202
1998-01-09	1835	1842	0.051	0.124
1998-01-23	1849	1856	0.137	0.445
1998-02-06	1863	1870	0.183	0.545
1998-02-20	1877	1884	0.066	0.131
1998-03-06	1891	1898	0.134	0.318
1998-03-20	1905	1912	0.08	0.181
1998-04-03	1919	1928.5	0.09	0.183
2014-05-24	7814	7819.75	0.14	0.089	0.706	1.852	0.02	2.997
2014-06-04	7825.5	7831.25	0.134	0.13	0.669	1.609	0.018	2.742
2014-06-16	7837	7842.75	0.195	0.176	0.851	2.371	0.026	3.884
2014-06-27	7848.5	7854.25	0.164	0.151	0.554	2.007	0.021	3.122
2014-07-09	7860	7865.75	0.137	0.168	0.358	1.63	0.018	2.497
2014-07-20	7871.5	7877.25	0.145	0.19	0.513	1.606	0.019	2.671
2014-08-01	7883	7888.75	0.104	0.113	0.413	1.38	0.014	2.167
2014-08-12	7894.5	7900.25	0.058	0.073	0.471	0.714	0.008	1.405
2014-08-24	7906	7911.75	0.107	0.078	0.167	1.011	0.014	1.525
2014-09-04	7917.5	7923.25	0.09	0.135	0.268	1.386	0.012	2.015
2014-09-16	7929	7934.75	0.079	0.12	0.231	1.148	0.01	1.696
2014-09-27	7940.5	7946.25	0.068	0.101	0.156	1.161	0.009	1.588
2014-12-18	8021	8027.5	0.085	0.191	0.124	1.852	0.011	2.379
2014-12-31	8034	8040.5	0.079	0.126	0.079	1.285	0.009	1.686
2015-01-13	8047	8053.5	0.051	0.134	0.11	0.866	0.007	1.237
2015-01-26	8060	8066.5	0.055	0.141	0.081	0.851	0.007	1.211
2015-02-08	8073	8079.5	0.041	0.125	0.042	0.616	0.005	0.885
2015-02-21	8086	8092.5	0.046	0.125	0.048	0.662	0.006	0.949
2015-03-06	8099	8105.5	0.035	0.086	0.074	0.422	0.005	0.669
2015-03-19	8112	8118.5	0.062	0.111	0.143	0.755	0.008	1.162
2015-04-01	8125	8131.5	0.042	0.056	0.124	0.57	0.006	0.854
2015-04-14	8138	8144.5	0.052	0.031	0.227	0.691	0.008	1.08
2015-05-23	8177	8182.5	0.021	0.023	0.047	0.312	0.003	0.434
2015-06-04	8189	8194	0.145	0.236	0.453	2.644	0.021	3.696
2015-06-14	8199	8204	0.16	0.28	0.398	1.817	0.027	2.894
2015-06-24	8209	8214	0.174	0.18	0.67	1.569	0.028	2.854
2015-07-04	8219	8224	0.007	0.002	0.019	0.054	0.001	0.094
2015-08-23	8269	8274	0.015	0.012	0.048	0.128	0.002	0.227
2015-09-02	8279	8284	0.072	0.044	0.277	0.895	0.01	1.395
2015-09-12	8289	8294	0.005	0.001	0.007	0.025	0.001	0.045
2015-10-14	8321	8329.25	0.073	0.15	0.17	1.384	0.01	1.887
2015-10-30	8337.5	8345.75	0.07	0.105	0.138	0.878	0.01	1.295
2015-11-16	8354	8362.25	0.069	0.175	0.217	2.116	0.01	2.68
2015-12-02	8370.5	8378.75	0.105	0.226	0.244	3.214	0.014	3.948
2015-12-19	8387	8395.25	0	0	0	0	0	0
2016-01-04	8403.5	8411.75	0.084	0.194	0.236	1.26	0.012	1.9
2016-01-21	8420	8428.25	0.064	0.205	0.173	1.1	0.009	1.638
2016-02-06	8436.5	8444.75	0.104	0.416	0.267	2.987	0.014	3.931
2016-02-23	8453	8461.25	0.062	0.177	0.118	1.343	0.008	1.792
2016-03-10	8469.5	8477.75	0.06	0.177	0.171	1.031	0.008	1.529
2016-03-27	8486	8494.25	0.075	0.133	0.333	0.933	0.009	1.586
2016-04-12	8502.5	8510.75	0.096	0.098	0.404	1.005	0.014	1.748
2016-04-29	8519	8527.25	0.037	0.064	0.147	0.488	0.005	0.793
2016-05-18	8538	8545	0.095	0.192	0.427	1.432	0.012	2.287
2016-06-01	8552	8559	0.13	0.202	0.544	1.68	0.017	2.75
2016-06-15	8566	8573	0.138	0.242	0.638	1.658	0.018	2.882
2016-06-29	8580	8587	0.177	0.225	0.985	2.727	0.024	4.378
2016-07-13	8594	8601	0.079	0.138	0.267	1.009	0.011	1.612
2016-07-27	8608	8615	0.147	0.158	0.322	1.635	0.019	2.482
2016-08-10	8622	8629	0.124	0.124	0.302	1.196	0.015	1.933
2016-08-24	8636	8643	0.101	0.086	0.309	1.178	0.013	1.826
2016-09-07	8650	8657	0.094	0.11	0.294	1.371	0.012	2.01
2016-09-21	8664	8671	0.139	0.142	0.31	1.513	0.016	2.312
2016-10-05	8678	8685	0.098	0.11	0.247	1.032	0.011	1.635
2016-10-19	8692	8699	0.033	0.043	0.12	0.39	0.004	0.635
2016-10-27	8700	8707.5	0.095	0.163	0.195	1.24	0.012	1.836
2016-11-11	8715	8722.5	0.131	0.171	0.343	1.506	0.016	2.347
2016-11-26	8730	8737.5	0.103	0.228	0.241	1.278	0.015	2.002
2016-12-11	8745	8752.5	0.101	0.164	0.24	1.51	0.013	2.167
2016-12-26	8760	8767.5	0.075	0.148	0.059	1.49	0.009	1.884
2017-01-10	8775	8782.5	0.062	0.204	0.166	1.051	0.008	1.577
2017-01-25	8790	8797.5	0.137	0.519	0.356	2.077	0.019	3.295
2017-02-09	8805	8812.5	0.067	0.184	0.157	1.038	0.009	1.547
2017-02-24	8820	8827.5	0.069	0.148	0.141	0.764	0.011	1.225
2017-03-11	8835	8842.5	0.179	0.202	0.629	1.38	0.025	2.659
2017-03-26	8850	8857.5	0.033	0.081	0.139	0.706	0.005	1.009
2017-04-10	8865	8872.5	0.133	0.109	0.556	0.888	0.021	1.886
2017-04-25	8880	8887.5	0.033	0.031	0.073	0.186	0.005	0.373
2017-05-11	8896	8902.5	0.178	0.178	1.408	1.622	0.025	3.654
2017-05-24	8909	8915.5	0.248	0.247	1.529	1.994	0.036	4.391
2017-06-06	8922	8928.5	0.131	0.176	0.594	1.708	0.017	2.804
2017-06-19	8935	8941.5	0.126	0.159	0.611	1.466	0.017	2.55
2017-07-02	8948	8954.5	0.12	0.125	0.581	1.339	0.017	2.345
2017-07-15	8961	8967.5	0.087	0.059	0.24	0.545	0.014	1.061
2017-07-28	8974	8980.5	0.083	0.099	0.356	0.804	0.012	1.467
2017-08-10	8987	8993.5	0.087	0.068	0.215	0.584	0.014	1.086
2017-08-23	9000	9006.5	0.072	0.108	0.219	0.65	0.01	1.158
2017-09-05	9013	9019.5	0.094	0.049	0.139	0.409	0.017	0.83
2017-09-18	9026	9032.5	0.068	0.074	0.261	0.679	0.01	1.184
2017-10-01	9039	9045.5	0.101	0.091	0.239	0.893	0.014	1.474
2017-10-14	9052	9057.5	0.259	0.25	0.554	2.55	0.035	4.001
2017-11-04	9073	9080	0.083	0.086	0.253	1.068	0.01	1.615
2017-11-18	9087	9094	0.081	0.124	0.317	1.123	0.01	1.768
2017-12-02	9101	9108	0.118	0.23	0.304	1.769	0.013	2.598
2017-12-16	9115	9122	0.087	0.164	0.192	1.393	0.009	1.966
2017-12-30	9129	9136	0.078	0.19	0.17	1.252	0.011	1.807
2018-01-13	9143	9150	0.066	0.135	0.141	1.17	0.008	1.612
2018-01-27	9157	9164	0.071	0.187	0.285	1.405	0.009	2.055
2018-02-10	9171	9178	0.059	0.108	0.294	1.172	0.008	1.722
2018-02-24	9185	9192	0.042	0.091	0.159	0.672	0.005	1.027
2018-03-10	9199	9206	0.078	0.081	0.4	0.736	0.013	1.412
2018-03-24	9213	9220	0.041	0.076	0.237	0.596	0.005	1.012
2018-04-07	9227	9234	0.029	0.048	0.151	0.496	0.004	0.767
2018-04-21	9241	9248	0.155	0.164	1.037	1.475	0.022	3.065
2018-05-26	9276	9282.5	0.158	0.287	0.635	1.239	0.023	2.555
2018-06-08	9289	9295.5	0.115	0.242	0.844	1.551	0.016	2.924
2018-06-21	9302	9308.5	0.183	0.199	0.958	1.777	0.026	3.392
2018-07-04	9315	9321.5	0.095	0.117	0.343	1.512	0.012	2.21
2018-07-17	9328	9334.5	0.122	0.115	0.366	1.18	0.016	1.966
2018-07-30	9341	9347.5	0.12	0.129	0.299	1.374	0.014	2.102
2018-08-12	9354	9360.5	0.11	0.152	0.307	1.243	0.013	1.975
2018-08-25	9367	9373.5	0.125	0.097	0.485	1.362	0.015	2.257
2018-09-07	9380	9386.5	0.032	0.064	0.075	0.711	0.004	0.93
2018-09-20	9393	9399.5	0.056	0.118	0.108	1.041	0.007	1.406
2018-10-03	9406	9412.5	0.084	0.196	0.202	2.201	0.011	2.81
2018-10-16	9419	9425.5	0.084	0.12	0.144	1.21	0.01	1.684
2018-10-29	9432	9438.5	0.078	0.127	0.139	1.211	0.009	1.671
2018-11-17	9451	9458	0.056	0.099	0.098	0.999	0.006	1.337
2018-12-01	9465	9472	0.084	0.162	0.142	1.212	0.01	1.726
2018-12-15	9479	9486	0.098	0.199	0.212	1.682	0.012	2.337
2018-12-29	9493	9500	0.089	0.219	0.16	1.262	0.011	1.863
2019-01-12	9507	9514	0.075	0.146	0.152	1.441	0.009	1.926
2019-01-26	9521	9528	0.043	0.072	0.068	0.518	0.005	0.766
2019-02-09	9535	9542	0.064	0.1	0.144	0.878	0.009	1.28
2019-02-23	9549	9556	0.037	0.095	0.086	0.658	0.005	0.931
2019-03-09	9563	9570	0.097	0.157	0.415	1.059	0.014	1.874
2019-03-23	9577	9584	0.098	0.123	0.421	0.953	0.013	1.743
2019-04-06	9591	9598	0.074	0.052	0.226	0.455	0.01	0.92
2019-04-20	9605	9612	0.1	0.1	0.434	0.77	0.015	1.554
2019-05-04	9619	9626	0.022	0.022	0.085	0.163	0.003	0.326
2019-05-24	9639	9646	0.081	0.124	0.425	0.847	0.011	1.599
2019-06-07	9653	9660	0.164	0.207	0.747	2.217	0.022	3.579
2019-06-21	9667	9674	0.078	0.116	0.176	0.717	0.01	1.204
2019-07-05	9681	9688	0.077	0.102	0.272	0.945	0.01	1.511
2019-07-19	9695	9702	0.119	0.143	0.595	1.592	0.016	2.626
2019-08-16	9723	9730	0.069	0.076	0.285	0.605	0.009	1.138
2019-08-30	9737	9744	0.102	0.157	0.285	1.507	0.013	2.205
2019-09-13	9751	9758	0.091	0.098	0.309	0.759	0.011	1.393
2019-09-27	9765	9772	0.084	0.101	0.205	1.217	0.01	1.733
2019-10-11	9779	9786	0.089	0.11	0.18	1.011	0.01	1.523
2019-10-25	9793	9800	0.101	0.171	0.255	1.734	0.012	2.413
2019-11-08	9807	9813	0.06	0.103	0.107	1.073	0.007	1.432
2019-11-23	9822	9829	0.08	0.143	0.121	1.713	0.01	2.177
2019-12-07	9836	9843	0.053	0.125	0.105	1.044	0.007	1.407
2019-12-21	9850	9857	0.071	0.155	0.176	1.296	0.009	1.803
2020-01-04	9864	9871	0.05	0.143	0.126	0.896	0.007	1.29
2020-01-18	9878	9885	0.067	0.155	0.185	1.133	0.009	1.641
2020-02-01	9892	9899	0.073	0.148	0.184	1.052	0.009	1.568
2020-02-15	9906	9913	0.052	0.099	0.129	0.918	0.007	1.274
2020-02-29	9920	9927	0.051	0.091	0.157	0.619	0.007	0.994
2020-03-14	9934	9941	0.051	0.092	0.147	0.479	0.008	0.845
2020-03-28	9948	9955	0.042	0.082	0.098	0.547	0.005	0.833
2020-04-11	9962	9969	0.066	0.08	0.309	0.663	0.009	1.218
2020-04-25	9976	9983	0.027	0.019	0.165	0.193	0.003	0.444
2020-05-09	9990	9997	0.11	0.098	0.623	0.707	0.015	1.702
2020-11-17	10182	10189	0.098	0.106	0.202	1.013	0.013	1.566
2020-12-01	10196	10203	0.119	0.273	0.261	1.11	0.015	1.941
2020-12-15	10210	10217	0.131	0.192	0.195	1.545	0.017	2.258
2020-12-29	10224	10231	0.09	0.122	0.164	1.248	0.012	1.76
2021-01-12	10238	10245	0.141	0.289	0.277	2.525	0.018	3.443
2021-01-26	10252	10259	0.078	0.109	0.144	1.295	0.009	1.745
2021-02-09	10266	10273	0.05	0.053	0.158	0.549	0.007	0.884
2021-02-23	10280	10287	0.082	0.107	0.23	1.116	0.011	1.659
2021-03-09	10294	10301	0.168	0.108	0.9	1.358	0.022	2.787
2021-03-23	10308	10315	0.189	0.048	1.252	0.838	0.026	2.612
2021-04-06	10322	10329	0.098	0.069	0.558	0.732	0.014	1.605
2021-04-20	10336	10343	0.144	0.097	0.492	0.899	0.023	1.85
2021-05-04	10350	10357	0.113	0.072	0.509	0.623	0.017	1.486
2021-05-28	10374	10381	0.156	0.191	0.628	1.454	0.021	2.665
2021-06-11	10388	10395	0.16	0.144	0.299	1.41	0.027	2.251
2021-06-25	10402	10409	0.133	0.2	0.285	1.96	0.019	2.777
2021-07-09	10416	10423	0.167	0.184	0.344	1.704	0.026	2.65
2021-07-23	10430	10437	0.082	0.099	0.158	0.857	0.012	1.318
2021-08-06	10444	10451	0.122	0.14	0.322	1.076	0.018	1.842
2021-08-20	10458	10465	0.047	0.058	0.082	0.581	0.007	0.838
2021-09-03	10472	10479	0.043	0.037	0.065	0.247	0.007	0.457
2021-09-17	10486	10493	0.088	0.038	0.239	0.38	0.011	0.878
2021-10-01	10500	10507	0.081	0.062	0.12	0.524	0.013	0.908
2021-10-15	10514	10521	0.093	0.099	0.172	0.892	0.012	1.394
2021-10-29	10528	10534.5	0.153	0.208	0.264	1.918	0.021	2.772
